# Supplementary material for: PUM1 and RPN1 are Optimum Reference Genes for Differential Gene Expression Analysis of Cancer Stem Cell and Epithelial-to-Mesenchymal Transition Markers in Breast Cancer
Source: Research Square preprint supplement (doi:10.21203/rs.3.rs-7762079/v1), 2025-11-10
Supplement: Supplementary file 1 [file d37f090fb9c89190892ef567.xlsx]

## Sheet: Supplementary Table  1
Study Design
Study Design: Study was made into 3 phases 1) Pilot 2) Screening 3) Validation
Phase	Name	Sample Size	Description	Outcome
Phase 1	Pilot Phase	6	qPCR was run for all candidate reference genes with undiluted and diluted cDNA samples. cDNA was uniformly diluted with 60µL of NFW.	PUM1 was shown to be the most stable reference gene
Phase 2	Screening Phase	12	qPCR was only run for PUM1 genes using 12 undiluted samples. These 12 samples were diluted such that the Cq of the sample reached the geomean of PUM1, i.e. 20.19 (+1 Cq=2.5X increase in sample volume).	PUM1 and RPN1 were most stable
Phase 3	Validation Phase	18	qPCR was run for ALDH1, CDH1, Vim,TWIST with PUM1 and RPN1

## Sheet: Supplementary Table 2
Clinical Information of Breast Cancer Cases
Sample	Age	BC type	Laterality	Molecular Subtype	cTNM	Stage	RNA CONCERNTRATION (ng/µl)
Sample A	60.7	IBC	RIGHT	HER2 ENRICHED	T4b N0 M0	3	47.6
Sample B	58.6	IBC	LEFT	HER2 ENRICHED	T2N1M0	2	36.4
Sample C	40.7	IBC	LEFT	HER2 ENRICHED	T3N1M0	3	98
Sample D	41.1	IBC	RIGHT	HER2 ENRICHED	T4BN1M0	3	14.4
Sample E	53.5	IBC	LEFT	HER2 ENRICHED	T4BN2M	3	too high
Sample F	70.6	IBC	RIGHT	HER2 Enriched	t4bn1m0	3	26.2
Sample G	56.1	IBC	LEFT	TNBC	T3N1M0	3	69
Sample H	39.1	IBC	RIGHT	TNBC	T3N3M0	3	396
Sample I	37.5	IBC	RIGHT	TNBC	t3n2m0	3	40
Sample J	50.11	IDC	LEFT	TNBC	t2n1m0	2	49.3
Sample K	61.6	IBC	LEFT	TNBC	ct3n2m0	3	135
Sample L	73.6	IBC	RIGHT	LUMINAL A	T2 N2 M0	3	3
Sample M	57.5	IBC	RIGHT	LUMINAL A	T3N0M0	2	41.2
Sample N	55.9	IBC	RIGHT	LUMINAL A	T4BN2M1	4	71
Sample O	51.7	IDC	RIGHT	LUMINAL A	Unknown		46.7
Sample P	55.3	IBC	LEFT	LUMINAL B	T2N0M0	2	54
Sample Q	59.9	IBC	LEFT	LUMINAL B	T2N1M0	2	91
Sample R	39	IBC	LEFT	LUMINAL B	T3N2M0	3	70

## Sheet: Supplementary Table 3
Pilot Phase for optimization of reference genes using qPCR
	Cq VALUES OF UNDILUTED BREAST TISSUE SAMPLES						Cq VALUES OF DILUTED BREAST TISSUE SAMPLES
Sample	PMM1	PUM1	GAPDH	B2M	RPN1	GUSB	PMM1	PMM1	PUM1	PUM1	GAPDH	GAPDH	B2M	B2M	RPN1	RPN1	GUSB	GUSB
Sample D	22.47	20.6	17.25	13.67	19.51	22.14	23.59	23.14	21.72	21.86	18.3	18.29	15.23	14.87	20.85	20.12	23.39	23.31
Sample F	21.24	18.78	14.23	12.14	17.34	18.62	22.41	22.75	20.38	20.4	14.09	14.04	14.14	13.28	18.55	18.59	19.71	19.77
Sample I	20.4	18.07	11.81	16.8	15.81	17.74	21.28	21.41	19.45	19.38	13.24	13.23	15.9	16.14	16.6	16.62	18.94	18.84
Sample L	21.63	19.73	15.34	15.4	18.01	20.44	22.89	22.72	20.83	20.58	16.97	16.66	16.68	16.82	19.39	19.06	21.51	21.36
Sample M	20.92	19.23	14.37	14.65	18.54	21.09	22.62	22.8	21.05	20.82	16.08	16.12	16.13	16.27	19.94	20.58	22.57	22.98

## Sheet: Supplementary Table 4
Screening Phase for optimization of reference genes using qPCR
	UNDILUTED	DILUTED
SAMPLE	PUM1	PMM1	PMM1	PUM1	PUM1	GAPDH	GAPDH	B2M	B2M	RPN1	RPN1	GUSB	GUSB
Sample A	18.47	20.21	21.3	19.18	19.1	15.26	15.29	13.15	13.1	17.41	17.79	20.85	20.8
Sample B	17.64	22.48	21.71	19.96	19.76	15.44	15.5	15.19	15.35	17.65	17.42	21.45	21.53
Sample C	17.23	22.55	22.85	20.03	20.11	17.28	17.3	15.31	15.2	19.47	19.35	22.53	22.27
Sample E	19.06	23.56	23.49	20.42	20.52	16.85	16.96	15.26	15.29	18.39	18.43	22.54	22.45
Sample G	20.75	25.19	25.03	20.78	20.79	17.86	17.94	15.03	15.14	19.69	19.7	22.49	22.73
Sample H	17.76	18.93	19.02	19.29	19.29	14.95	14.6	12.52	12.49	16.56	15.81	19.89	19.79
Sample J	18.23	21.8	21.36	20.22	19.42	14.47	14.58	14.34	13.91	17.44	17.53	20.41	20.28
Sample K	16.46	21.03	20.56	18.3	18.34	15.44	15.54	14.97	14.93	16.26	15.81	21.03	20.87
Sample N	17.39	23.23	23.39	20.08	20.04	18.13	18.17	14.35	14.23	19.14	17.49	21.65	21.76
Sample O	20.69	21.76	22.14	19.51	19.52	15.36	15.21	13.49	13.44	17.42	17.91	19.9	19.87
Sample P	19.39	23.08	23.33	20.59	20.19	17.39	17.43	13.4	13.46	19.04	19.01	22.31	22.32
Sample Q	16.26	21.34	21.28	19.22	19.23	16.2	16.15	14.9	14.86	18.26	18.26	20.68	20.42
Sample R	16.04	20.29	20.54	19.22	19.19	15.93	15.94	14.96	14.92	18.72	18.72	19.31	19.24

## Sheet: Supplementary Table 5
Validation of optimum reference genes using CSC and EMT markers
SAMPLE	MOLECULAR SUBTYPE	CASE/CONTROL	PUM1 Cq	PUM1 Cq	Mean PUM1	RPN1 Cq	RPN1 Cq	Mean RPN1	ALDH1 Cq	ALDH1 Cq	ALDH1Mean	ΔCq ALDH1 (ALDH1 Cq-PUM1 Cq)	ΔΔCq ALDH1 (Cq- Average of control Cq (PUM1))	RQ ALDH1 (PUM1)	ΔCq ALDH1 (ALDH1 Cq-RPN1 Cq)	ΔΔCq ALDH1 (Cq- Average of control Cq (RPN1))	RQ ALDH1 (RPN1)	VIM Cq	VIM Cq	Mean VIM	ΔCq VIM (VIM Cq-PUM1 Cq)	ΔΔCq VIM (Cq- Average of control Cq (PUM1))	RQ VIM (PUM1)	ΔCq VIM (VIM Cq-RPN1 Cq)	ΔΔCq VIM (Cq- Average of control Cq (RPN1))	RQ VIM (RPN1)	TWIST Cq	TWIST Cq	Mean TWIST	ΔCq TWIST (TWIST Cq-PUM1 Cq)	ΔΔCq TWIST (Cq- Average of control Cq (PUM1))	RQ TWIST (PUM1)	ΔCq TWIST (TWIST Cq-RPN1 Cq)	ΔΔCq TWIST (Cq- Average of control Cq (RPN1))	RQ TWIST (RPN1)	CDH1 Cq	CDH1 Cq	Mean CDH1	ΔCq CDH1 (CDH1 Cq-PUM1 Cq)	ΔΔCq CDH1 (Cq- Average of control Cq (PUM1))	RQ CDH1 (PUM1)	ΔCq CDH1 (CDH1 Cq-RPN1 Cq)	ΔΔCq CDH1 (Cq- Average of control Cq (RPN1))	RQ CDH1 (RPN1)
Sample A	HER2 ENRICHED	CASE	18.85	18.67	18.76	17.15	16.78	16.97	17.52	17.76	17.64	-1.12	-3.5	11.3137	0.67	-3.26	9.57983	14.56	14.33	14.445	-4.315	-0.935	1.91189	-2.525	-0.705	1.63014	19.56	19.85	19.705	0.945	-2.855	7.23504	2.735	-2.615	6.12623	18.67	18.97	18.82	0.06	1.96	0.257028	1.85	2.195	0.218393
Sample B	HER2 ENRICHED	CASE	20.62	20.71	20.67	19.1	18.9	19	23.21	23.2	23.21	2.54	0.16	0.895025	4.21	0.28	0.823591	17.77	17.63	17.7	-2.97	0.41	0.752623	-1.3	0.52	0.697372	22.75	22.65	22.7	2.03	-1.77	3.41054	3.7	-1.65	3.13834	18.89	18.96	18.93	-1.74	0.16	0.895025	-0.07	0.275	0.82645
Sample C	HER2 ENRICHED	CASE	20.59	20.56	20.58	20.12	20.13	20.13	21.31	21.48	21.4	0.82	-1.56	2.94854	1.27	-2.66	6.32033	16.15	16.21	16.18	-4.4	-1.02	2.02792	-3.95	-2.13	4.37717	22.91	22.83	22.87	2.29	-1.51	2.8481	2.74	-2.61	6.10504	19.85	20	19.93	-0.65	1.25	0.420448	-0.2	0.145	0.904379
Sample D	HER2 ENRICHED	CASE	22.73	22.35	22.54	20.91	21	20.96	22.64	22.83	22.74	0.2	-2.18	4.53154	1.78	-2.15	4.43828	17.06	17.01	17.035	-5.505	-2.125	4.36203	-3.925	-2.105	4.30198	23.19	23.23	23.21	0.67	-3.13	8.75435	2.25	-3.1	8.57419	25.17	25.1	25.14	2.6	4.5	0.0441942	4.18	4.525	0.0434349
Sample E	HER2 ENRICHED	CASE	21.48	21.37	21.43	19.1	19.28	19.19	23.74	23.9	23.82	2.39	0.01	0.993092	4.63	0.7	0.615572	16.61	16.88	16.745	-4.685	-1.305	2.47084	-2.445	-0.625	1.54221	25.98	26.34	26.16	4.73	0.93	0.524858	6.97	1.62	0.325335	19.84	20.02	19.93	-1.5	0.4	0.757858	0.74	1.085	0.471392
Sample F	HER2 ENRICHED	CASE	20.97	20.94	20.96	19.02	19.29	19.16	18.71	18.8	18.76	-2.2	-4.58	23.9176	-0.4	-4.33	20.1122	15.73	15.65	15.69	-5.27	-1.89	3.70635	-3.47	-1.65	3.13834	23.61	23.33	23.47	2.51	-1.29	2.44528	4.31	-1.04	2.05623	18.23	19.19	18.71	-2.25	-0.35	1.27456	-0.45	-0.105	1.07549
Sample G	TNBC	CASE	23.98	24.07	24.03	22.89	22.9	22.89	24.07	24	24.03	0	-2.38	5.20537	1.14	-2.79	6.9163	19.63	19.66	19.645	-4.385	-1.005	2.00694	-3.245	-1.425	2.68515	26.37	26.23	26.3	2.27	-1.53	2.88786	3.41	-1.94	3.83706	23.28	23.23	23.26	-0.77	1.13	0.456916	0.37	0.715	0.609205
Sample H	TNBC	CASE	19.98	20.1	20.04	18.42	18.07	18.25	22.14	22.03	22.08	2.04	-0.34	1.26576	3.83	-0.1	1.07177	16.73	16.79	16.76	-3.28	0.1	0.933033	-1.49	0.33	0.795536	23.86	23.74	23.8	3.76	-0.04	1.02811	5.55	0.2	0.870551	18.66	18.13	18.4	-1.64	0.26	0.835088	0.15	0.495	0.709562
Sample I	TNBC	CASE	20.06	20.14	20.1	17.36	17.24	17.3	20.6	20.67	20.64	0.54	-1.84	3.5801	3.34	-0.59	1.50525	17.44	17.39	17.415	-2.685	0.695	0.617709	0.115	1.935	0.261521	26.04	25.72	25.88	5.78	1.98	0.25349	8.58	3.23	0.106579	16.24	16.37	16.31	-3.79	-1.89	3.70635	-0.99	-0.645	1.56374
Sample J	TNBC	CASE	19.99	20.31	20.15	17.21	17.34	17.28	20.02	20.23	20.13	-0.02	-2.4	5.27803	2.85	-1.08	2.11404	16.42	17.2	16.81	-3.34	0.04	0.972655	-0.47	1.35	0.392292	22.86	22.79	22.825	2.675	-1.125	2.18102	5.545	0.195	0.873573	19.51	19.62	19.57	-0.58	1.32	0.400535	2.29	2.635	0.160985
Sample K	TNBC	CASE	19.16	19.36	19.26	17.84	17.92	17.88	23.54	23.45	23.5	4.24	1.86	0.275476	5.62	1.69	0.309927	14.95	15.01	14.98	-4.28	-0.9	1.86607	-2.9	-1.08	2.11404	25.74	25.52	25.63	6.37	2.57	0.168404	7.75	2.4	0.189465	19.28	19.57	19.43	0.17	2.07	0.238159	1.55	1.895	0.268874
Sample L	LUMINAL A	CONTROL	21.62	21.97	21.8	19.85	19.87	19.86	22.25	22.36	22.3	0.5	-1.88	3.68075	2.44	-1.49	2.80889	17.25	17.18	17.215	-4.585	-1.205	2.30537	-2.645	-0.825	1.77154	24.24	24.07	24.155	2.355	-1.445	2.72263	4.295	-1.055	2.07772	19.64	19.76	19.7	-2.1	-0.2	1.1487	-0.16	0.185	0.879649
Sample M	LUMINAL A	CONTROL	21.46	21.61	21.54	20.61	20.78	20.69	26.17	26.58	26.38	4.84	2.46	0.181747	5.69	1.76	0.295248	20.3	20.38	20.34	-1.2	2.18	0.220676	-0.35	1.47	0.360982	27.73	28.83	28.28	6.74	2.94	0.130308	7.59	2.24	0.211686	20.05	19.91	19.98	-1.56	0.34	0.790041	-0.71	-0.365	1.28788
Sample N	LUMINAL A	CONTROL	20.87	20.85	20.86	19.48	19.42	19.45	23.14	23.25	23.19	2.33	-0.05	1.03526	3.74	-0.19	1.14076	16.58	16.65	16.615	-4.245	-0.865	1.82134	-2.835	-1.015	2.0209	24.31	23.86	24.085	3.225	-0.575	1.48968	4.635	-0.715	1.64148	18.4	18.58	18.49	-2.37	-0.47	1.38511	-0.96	-0.615	1.53156
Sample O	LUMINAL A	CONTROL	20.63	20.51	20.57	18.54	18.54	18.54	22.44	22.39	22.42	1.85	-0.53	1.44393	3.88	-0.05	1.03526	17.02	17.13	17.075	-3.495	-0.115	1.08298	-1.465	0.355	0.78187	23.42	23.45	23.435	2.865	-0.935	1.91189	4.895	-0.455	1.37078	18.96	19.02	18.99	-1.58	0.32	0.80107	0.45	0.795	0.576343
Sample P	LUMINAL B	CASE	21.87	22.22	22.05	20.03	20.06	20.05	24.99	24.74	24.86	2.81	0.43	0.742262	4.81	0.88	0.543367	18.6	18.71	18.655	-3.395	-0.015	1.01045	-1.395	0.425	0.744839	24.79	24.39	24.59	2.54	-1.26	2.39496	4.54	-0.81	1.75321	19.11	18.99	19.05	-3	-1.1	2.14355	-1	-0.655	1.57462
Sample Q	LUMINAL B	CASE	19.96	20.05	20.01	18.9	19.15	19.03	22.17	22.43	22.3	2.29	-0.09	1.06437	3.27	-0.66	1.58008	17.84	18.02	17.93	-2.08	1.3	0.406126	-1.1	0.72	0.607097	23.1	23.4	23.25	3.24	-0.56	1.47427	4.22	-1.13	2.18859	17.74	18.04	17.89	-2.12	-0.22	1.16473	-1.14	-0.795	1.73508
Sample R	LUMINAL B	CASE	20.01	20.13	20.07	18.18	18.17	18.17	23.29	23.51	23.4	3.33	0.95	0.517632	5.23	1.3	0.406126	20.07	20.01	20.04	-0.03	3.35	0.098073	1.87	3.69	0.0774817	17.82	17.8	17.81	-2.26	-6.06	66.7178	-0.36	-5.71	52.3457	17.3	17.33	17.32	-2.75	-0.85	1.8025	-0.85	-0.505	1.41912
